# Supplementary material
Source: MDPI journal article supplement (https://www.mdpi.com/2073-4344/11/8/995)
Supplement: s1 [file s1]

## **SUPPORTING INFORMATION**

### **Conversion of residual palm oil into green diesel and bio-kerosene fuels under sub- and supercritical conditions employing Nickel-Raney as catalyst**

**Carolina Zanon Costa<sup>1</sup>, Eduardo Falabella Sousa-Aguiar<sup>1</sup>, Maria Antonieta Peixoto Gimenes Couto<sup>1</sup>, Débora de Almeida Azevedo<sup>2</sup>, and José Faustino Souza de Carvalho Filho<sup>1\*</sup>**

**1 Escola de Química, Universidade federal do Rio de Janeiro, Rio de Janeiro 21941-909, Brazil;**

**2 Instituto de Química, Universidade Federal do Rio de Janeiro, RJ, 21941-909, Brazil**

**\* Correspondence: faustinocarvalho@gmail.com; Tel.: +55-21-971808257**

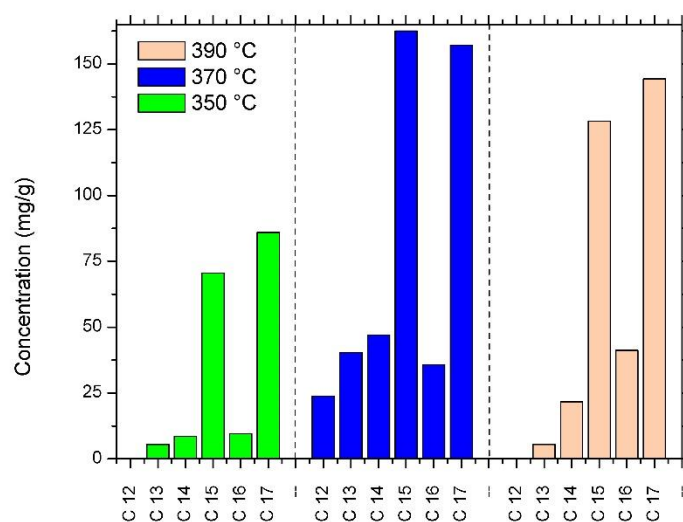

**Figure S1.** Hydrocarbon quantification by GC-MS for the reaction carried out at 10 wt.% of catalyst, 6 h, and biomass:water ratio of 1:2.

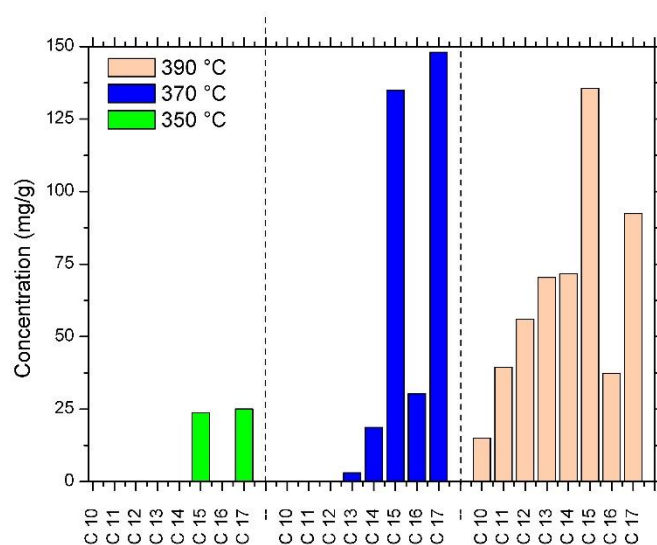

**Figure S2.** Hydrocarbon quantification by GC-MS for the reaction carried out at 7.5 wt.% of catalyst, 6 h, and biomass:water ratio of 1:2.

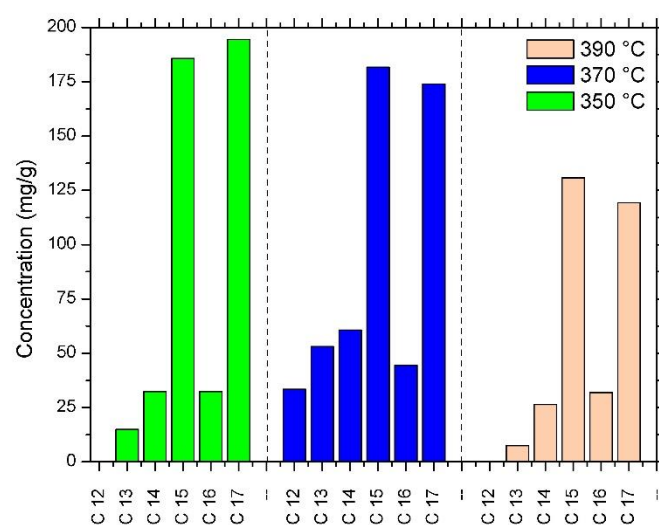

**Figure S3.** Hydrocarbon quantification by GC-MS for the reaction carried out at 5 wt.% of catalyst, 6 h, and biomass:water ratio of 1:2.

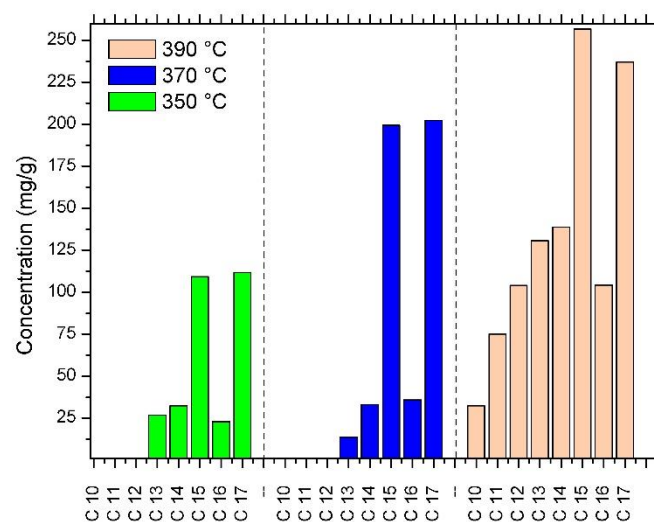

**Figure S4.** Hydrocarbon quantification by GC-MS for the reaction carried out at 10 wt.% of catalyst, 3.5 h, and biomass:water ratio of 1:2.

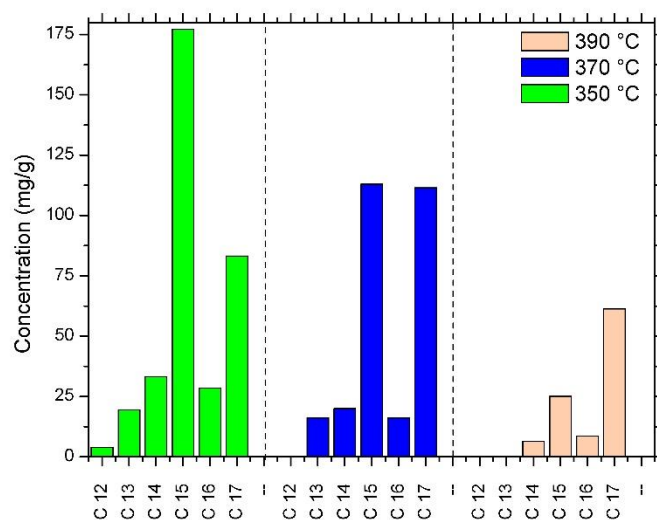

**Figure S5.** Hydrocarbon quantification by GC-MS for the reaction carried out at 7.5 wt.% of catalyst, 3.5 h, and biomass:water ratio of 1:2.

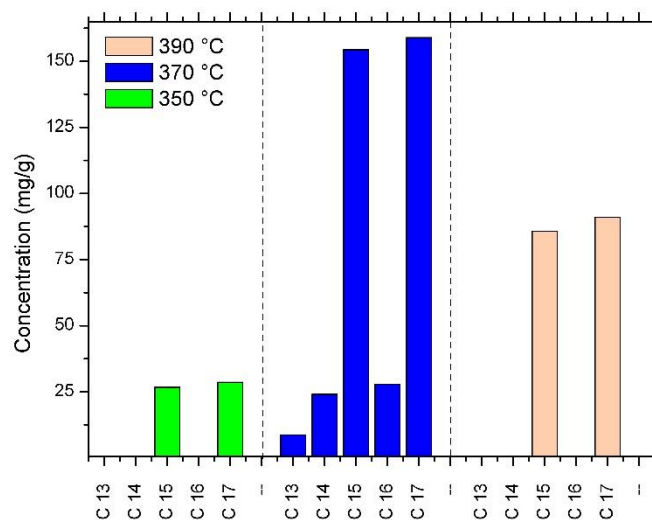

**Figure S6.** Hydrocarbon quantification by GC-MS for the reaction carried out at 5 wt.% of catalyst, 3.5 h, and biomass:water ratio of 1:2.

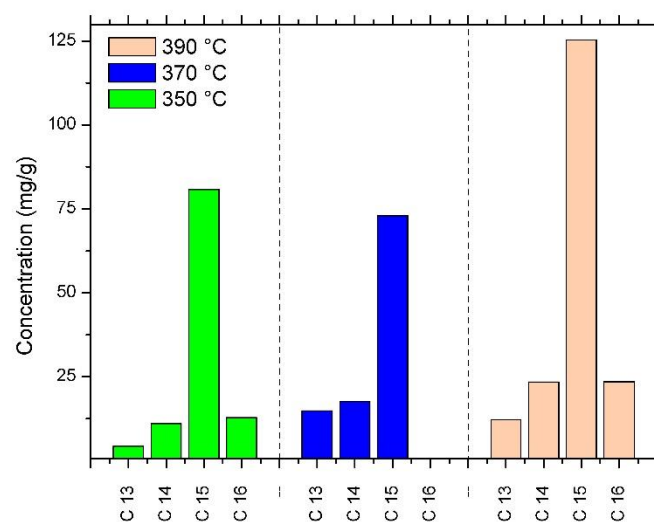

**Figure S7.** Hydrocarbon quantification by GC-MS for the reaction carried out at 10 wt.% of catalyst, 1 h, and biomass:water ratio of 1:2.

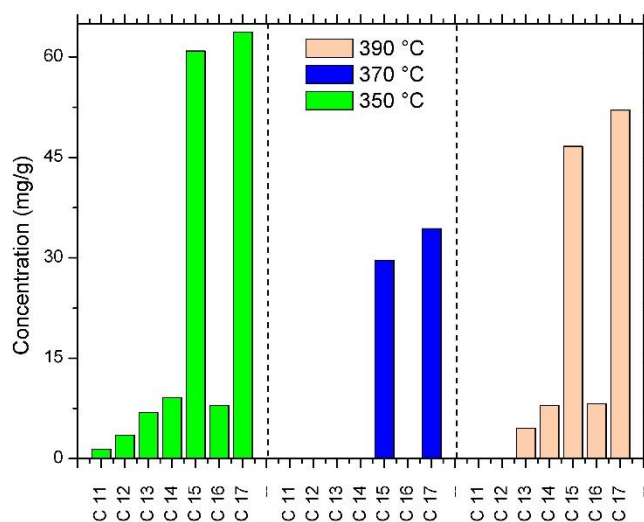

**Figure S8.** Hydrocarbon quantification by GC-MS for the reaction carried out at 5 wt.% of catalyst, 1 h, and biomass:water ratio of 1:2.

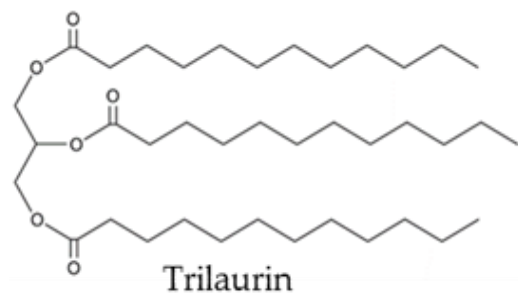

**Figure S9.** Hydrolysis reaction of trilaurin.

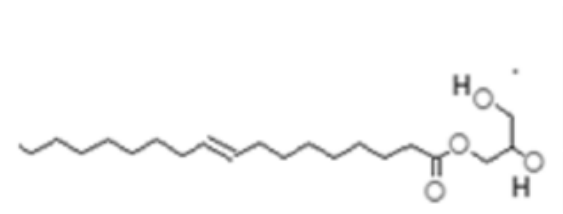

**Figure S10.** Hydrolysis reaction of monoolein.

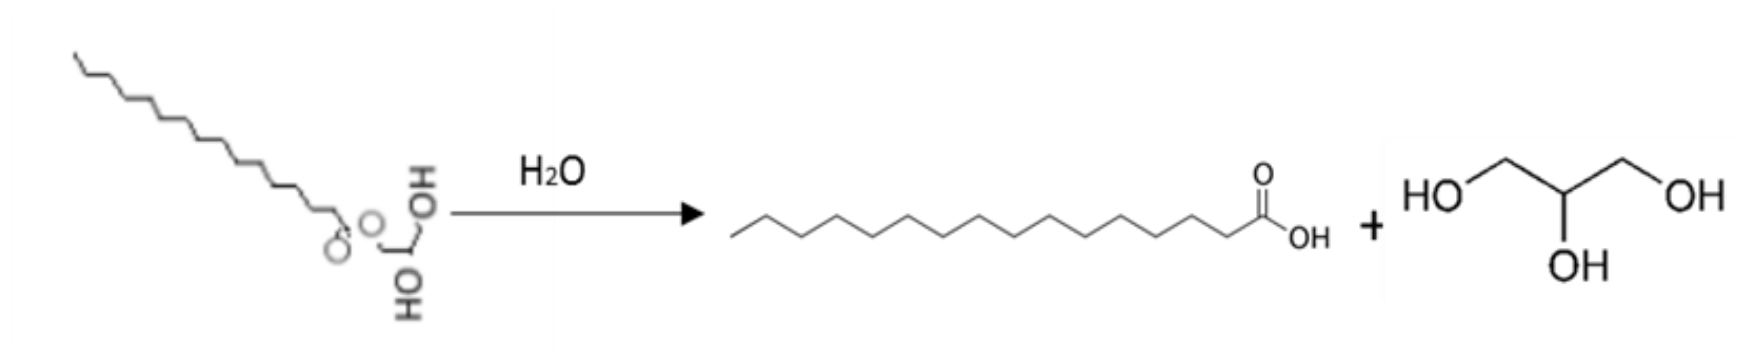

**Figure S11.** Hydrolysis reaction of monopalmitin.
